# Supplementary material for: IL-17a promotes hepatocellular carcinoma by increasing FAP expression in hepatic stellate cells via activation of the STAT3 signaling pathway
Source: PubMed Central journal article supplement (PMC11091202; doi:10.1038/s41420-024-01995-4), 2024-05-13

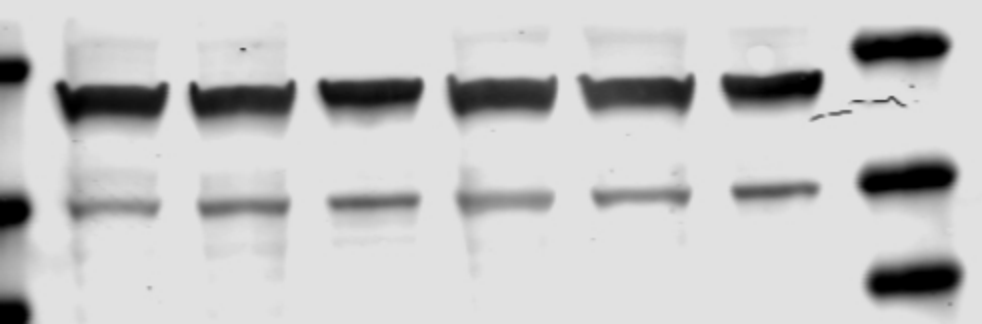

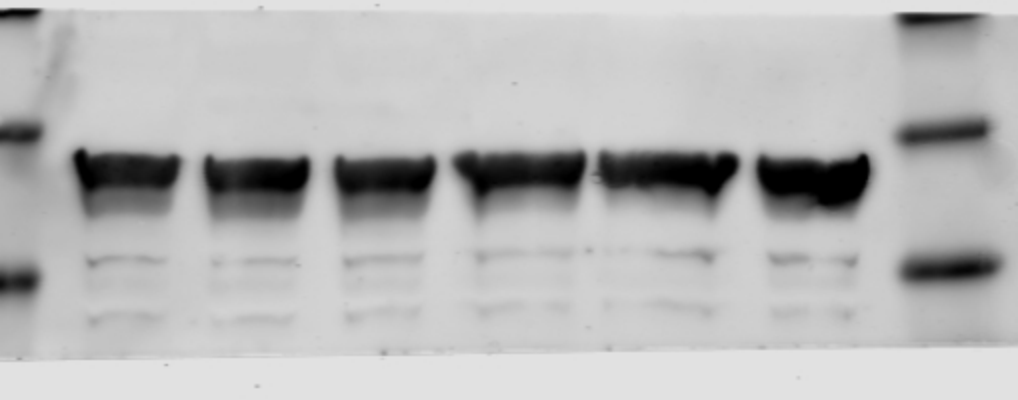

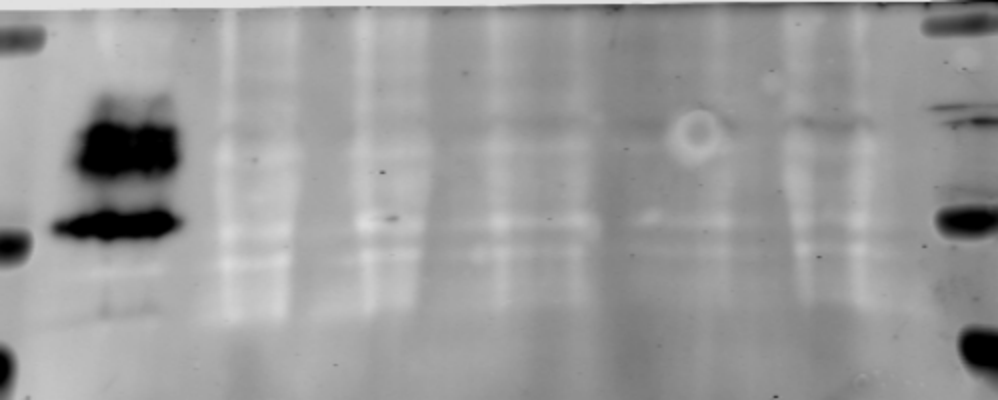

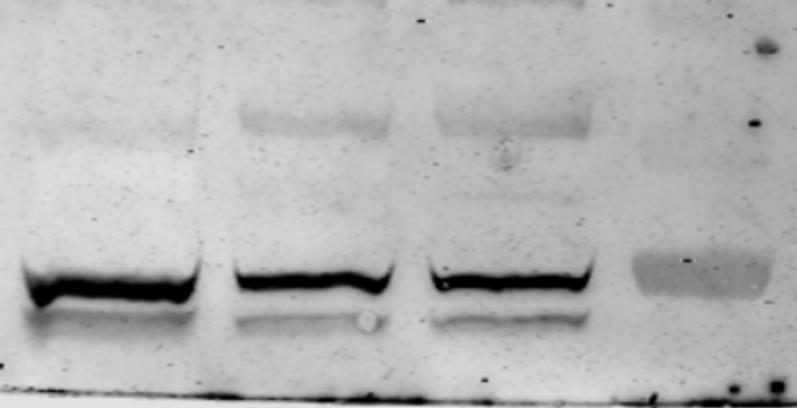

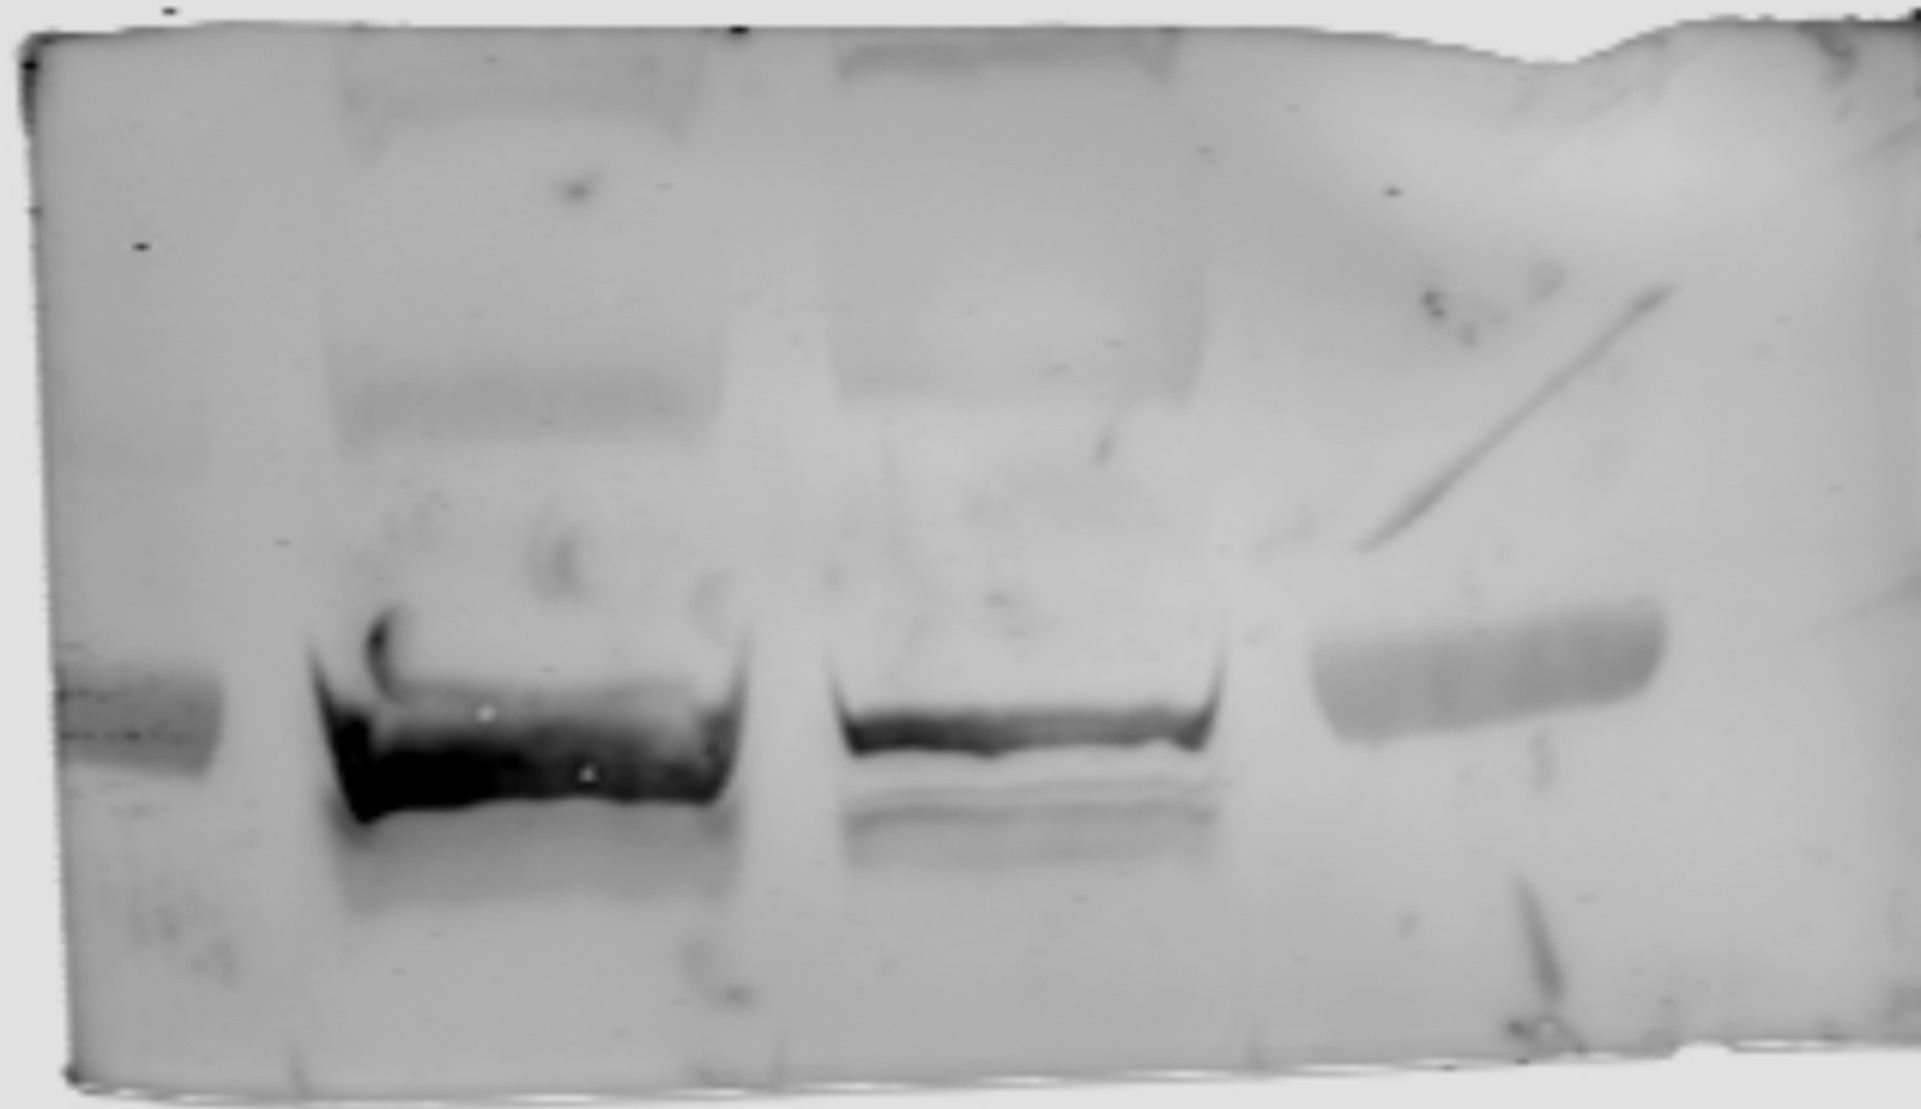

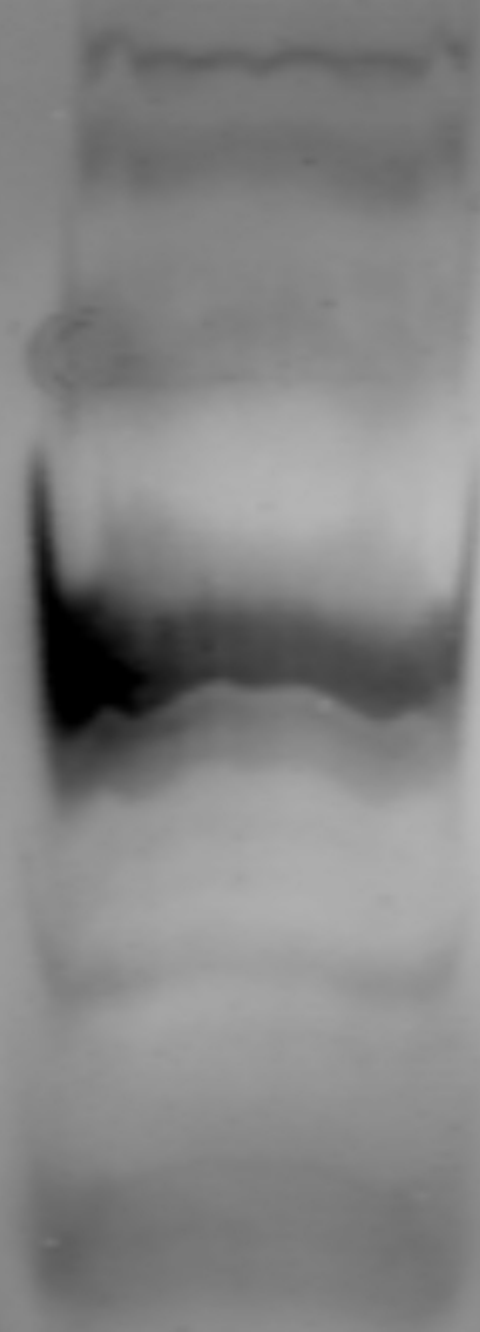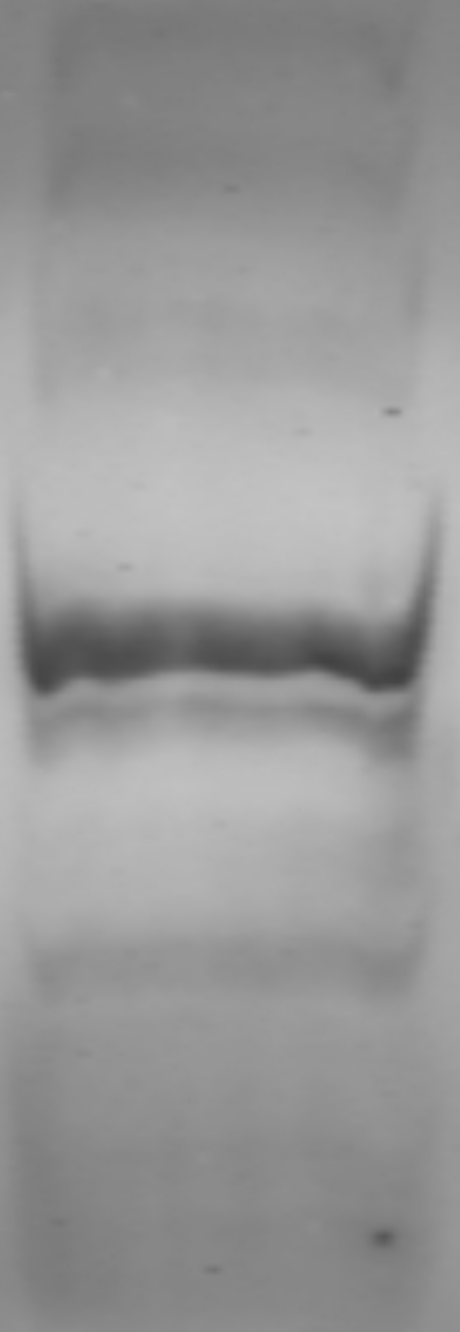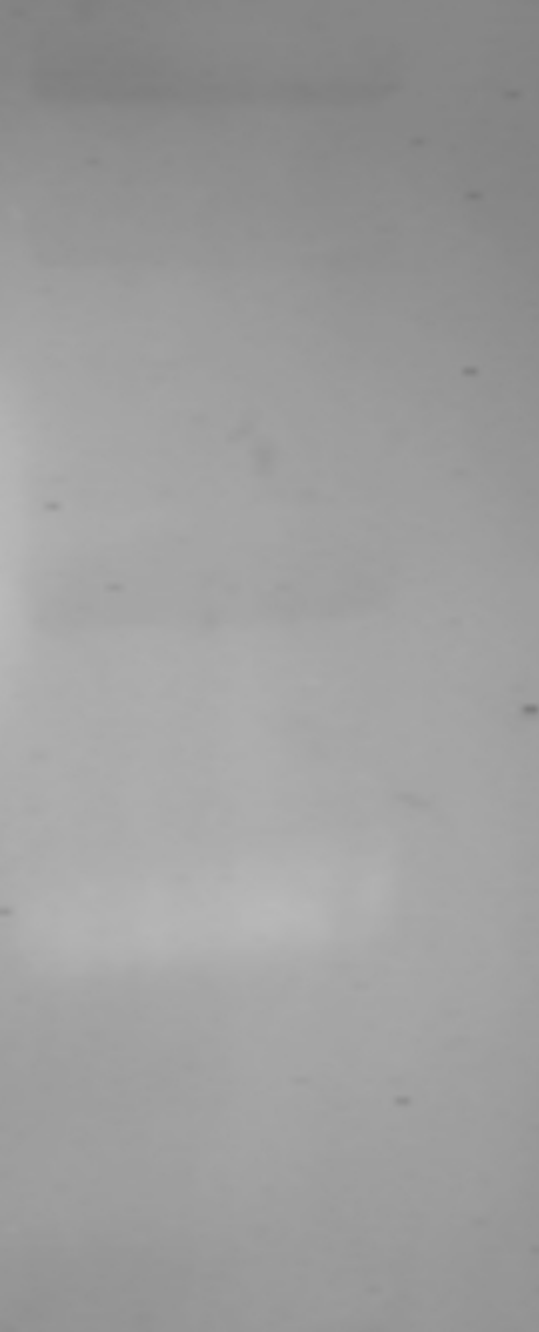

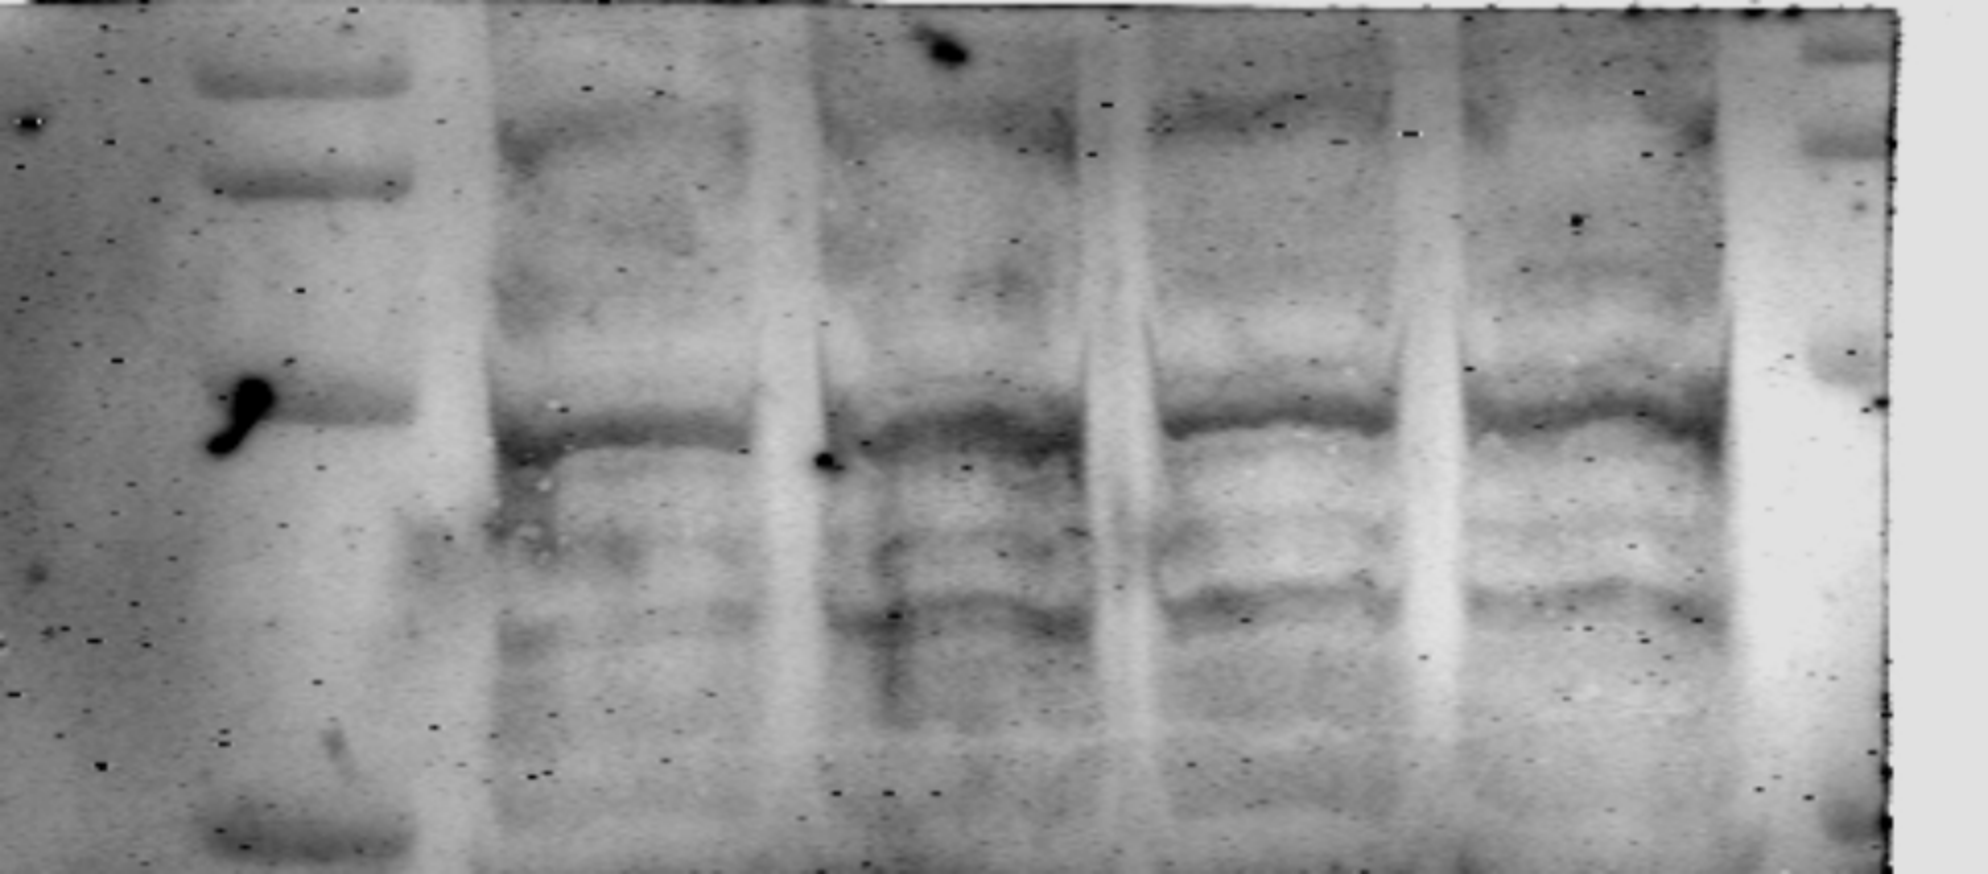

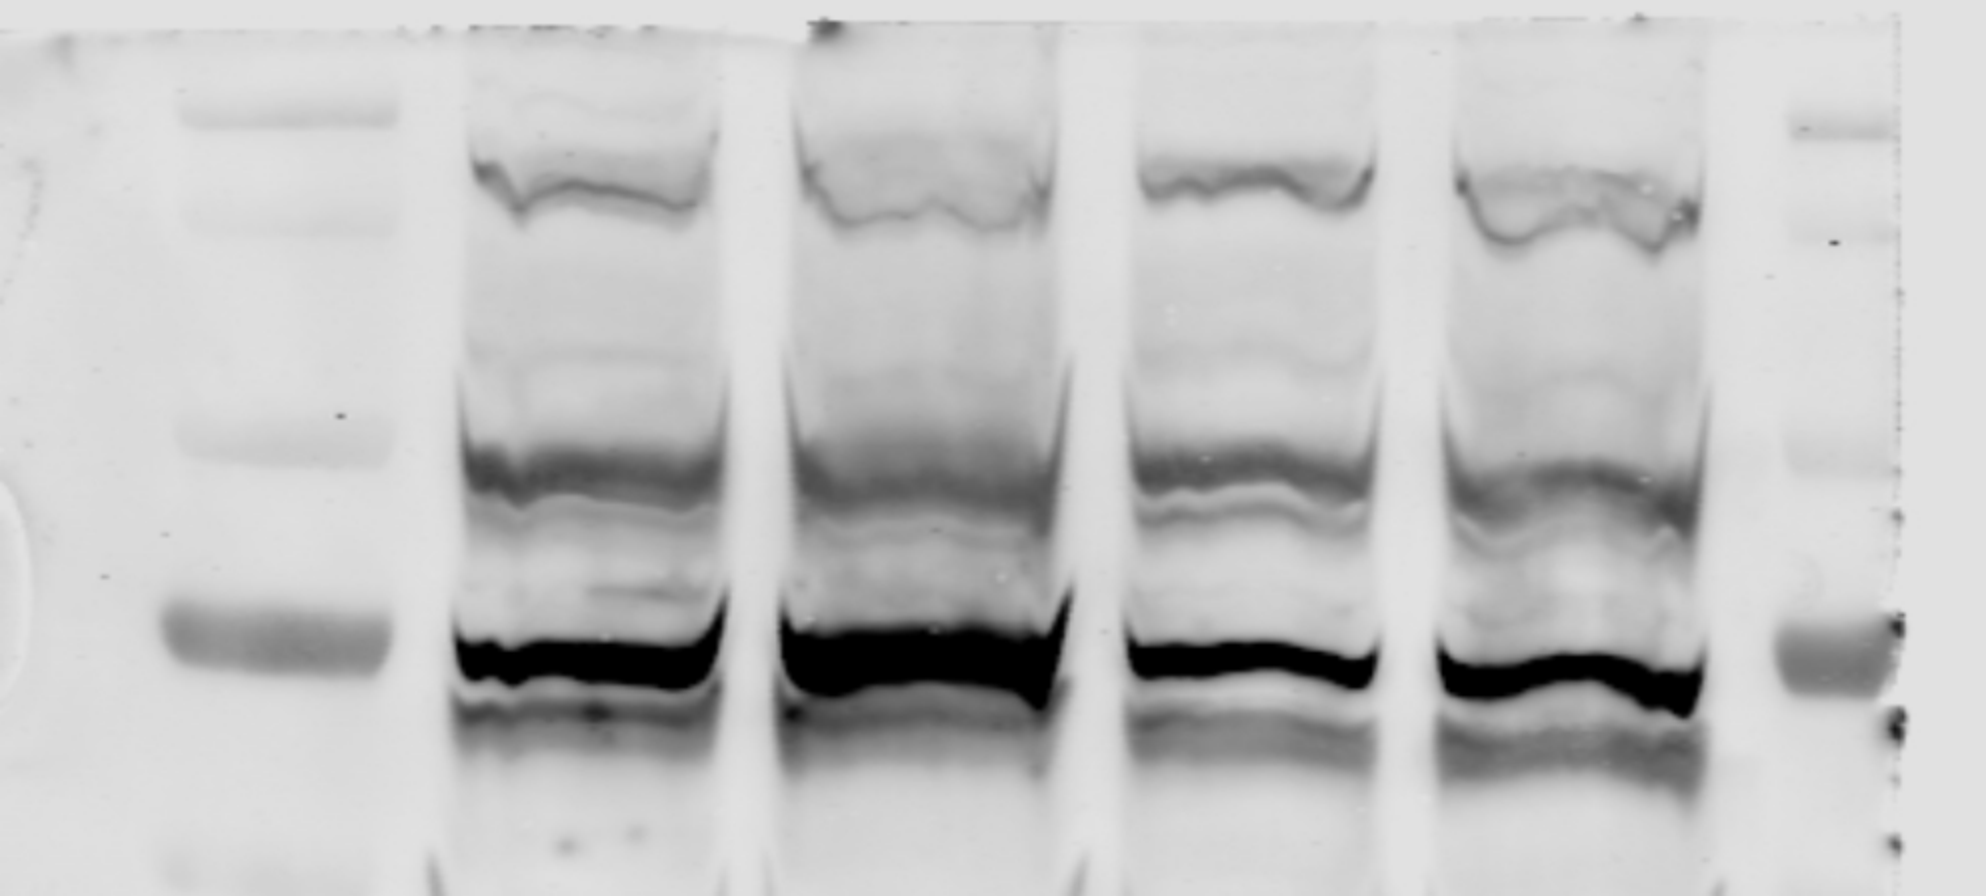



1

1

1

1

1

1

1

1

11

12

13

14

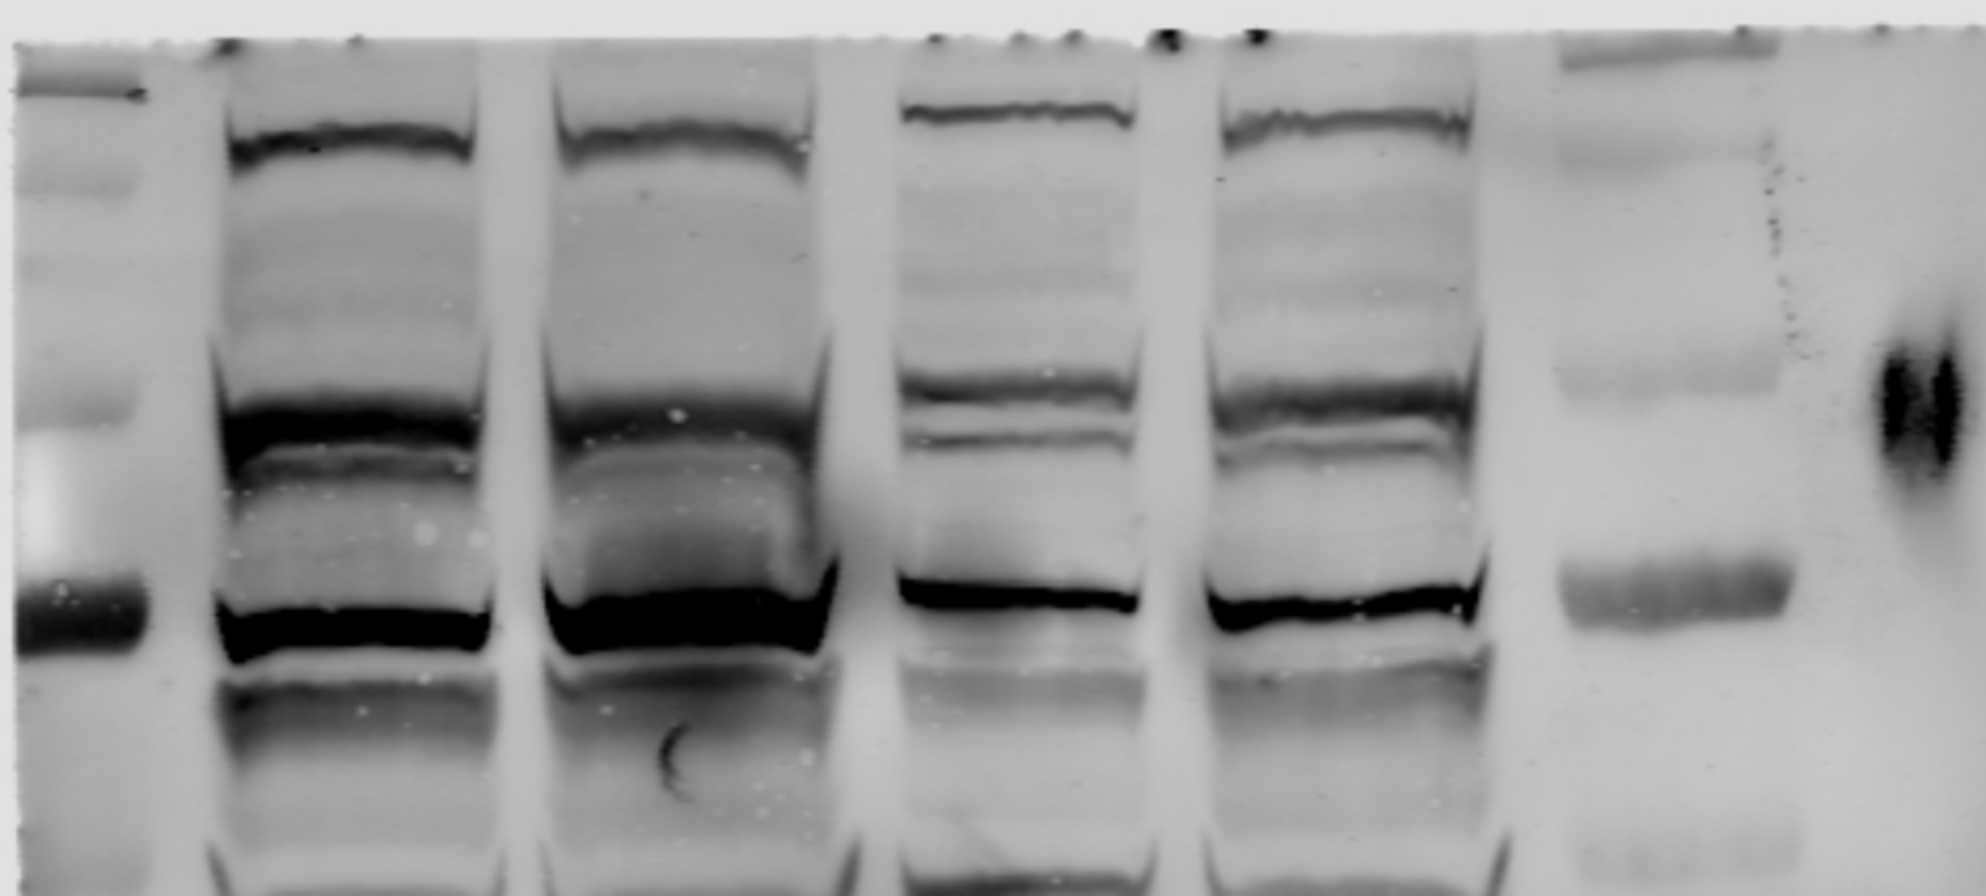

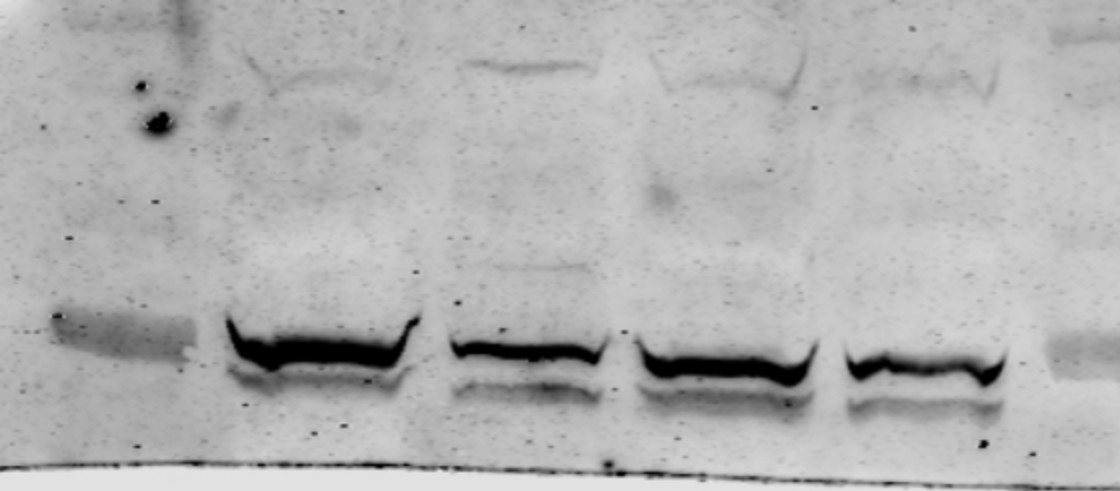

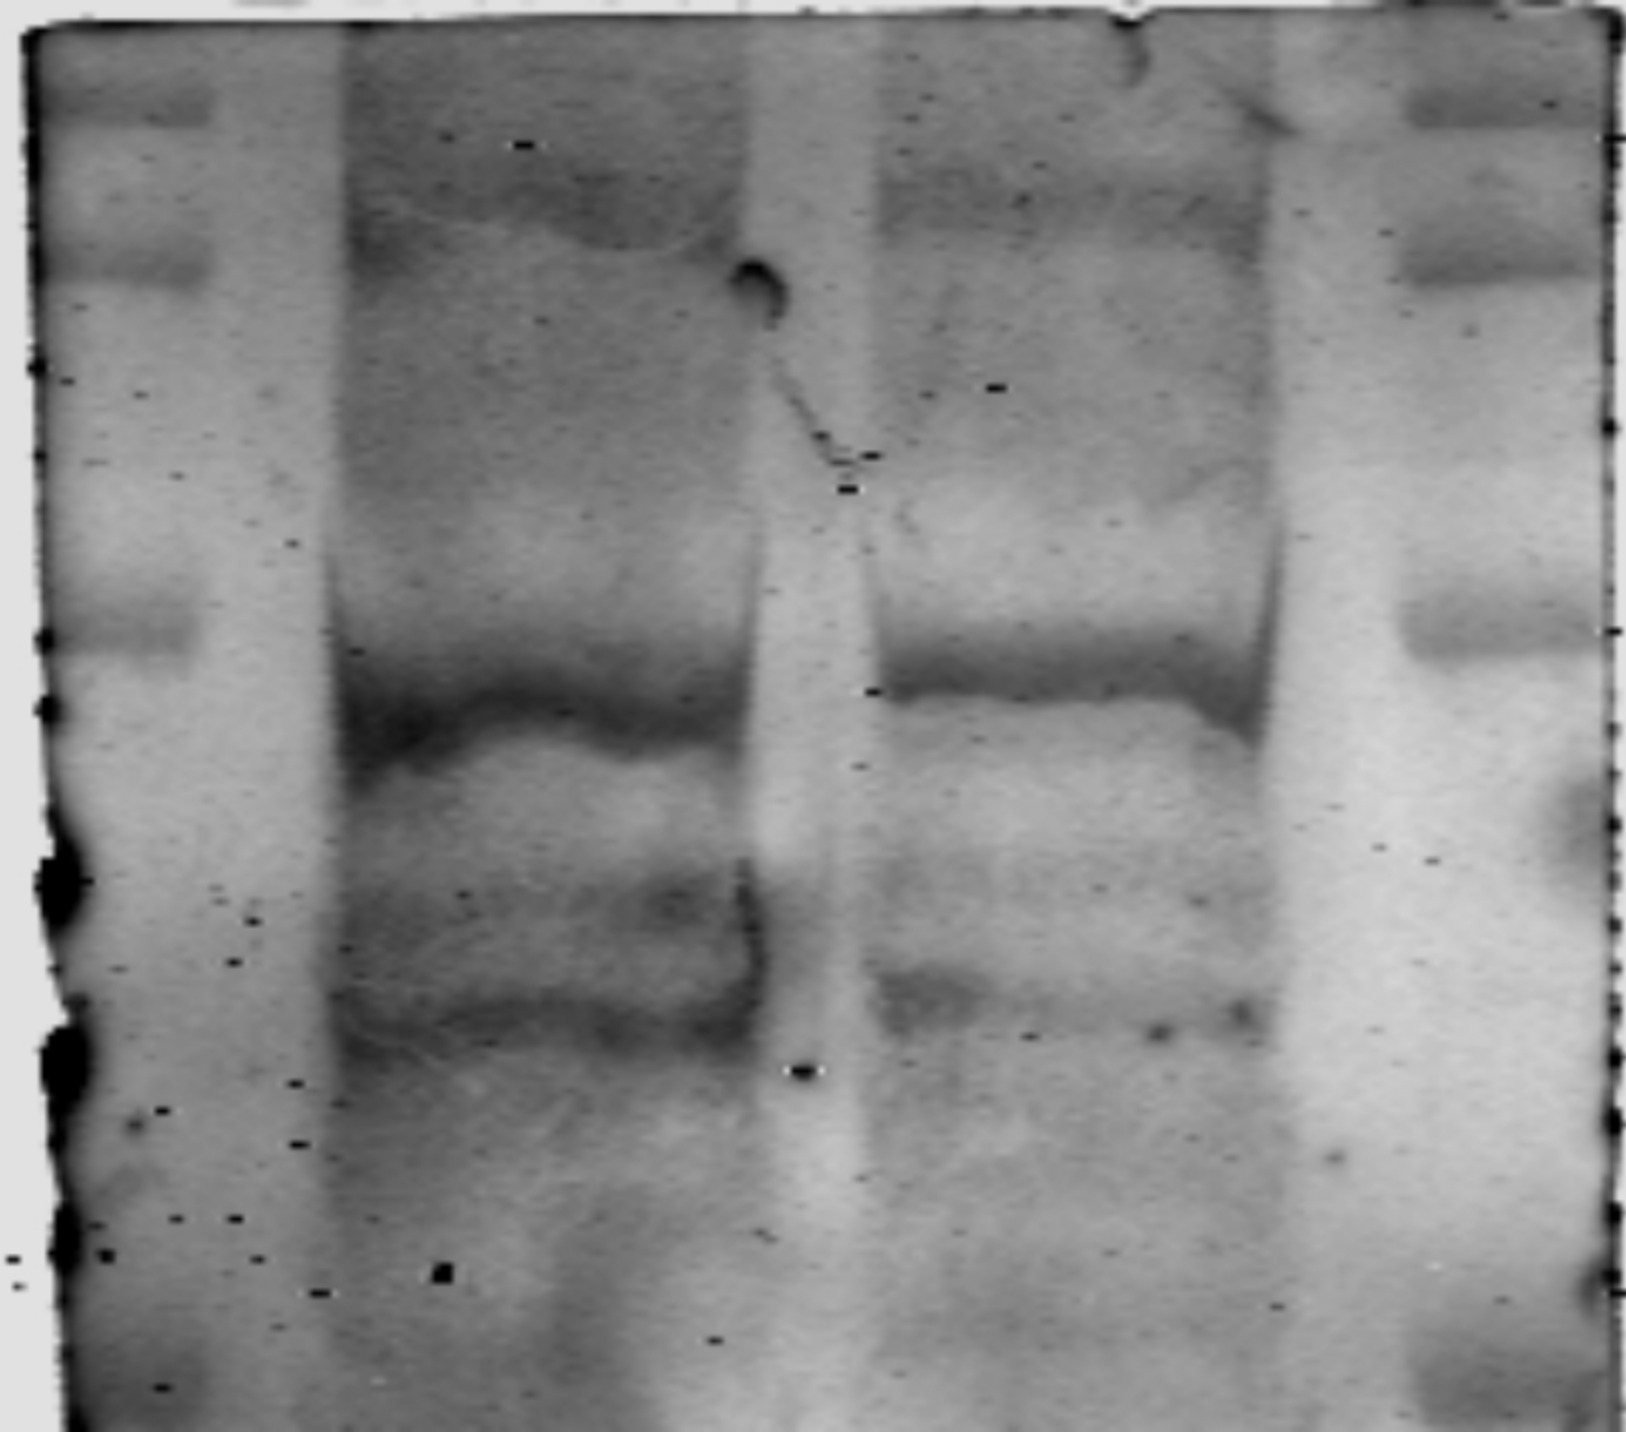

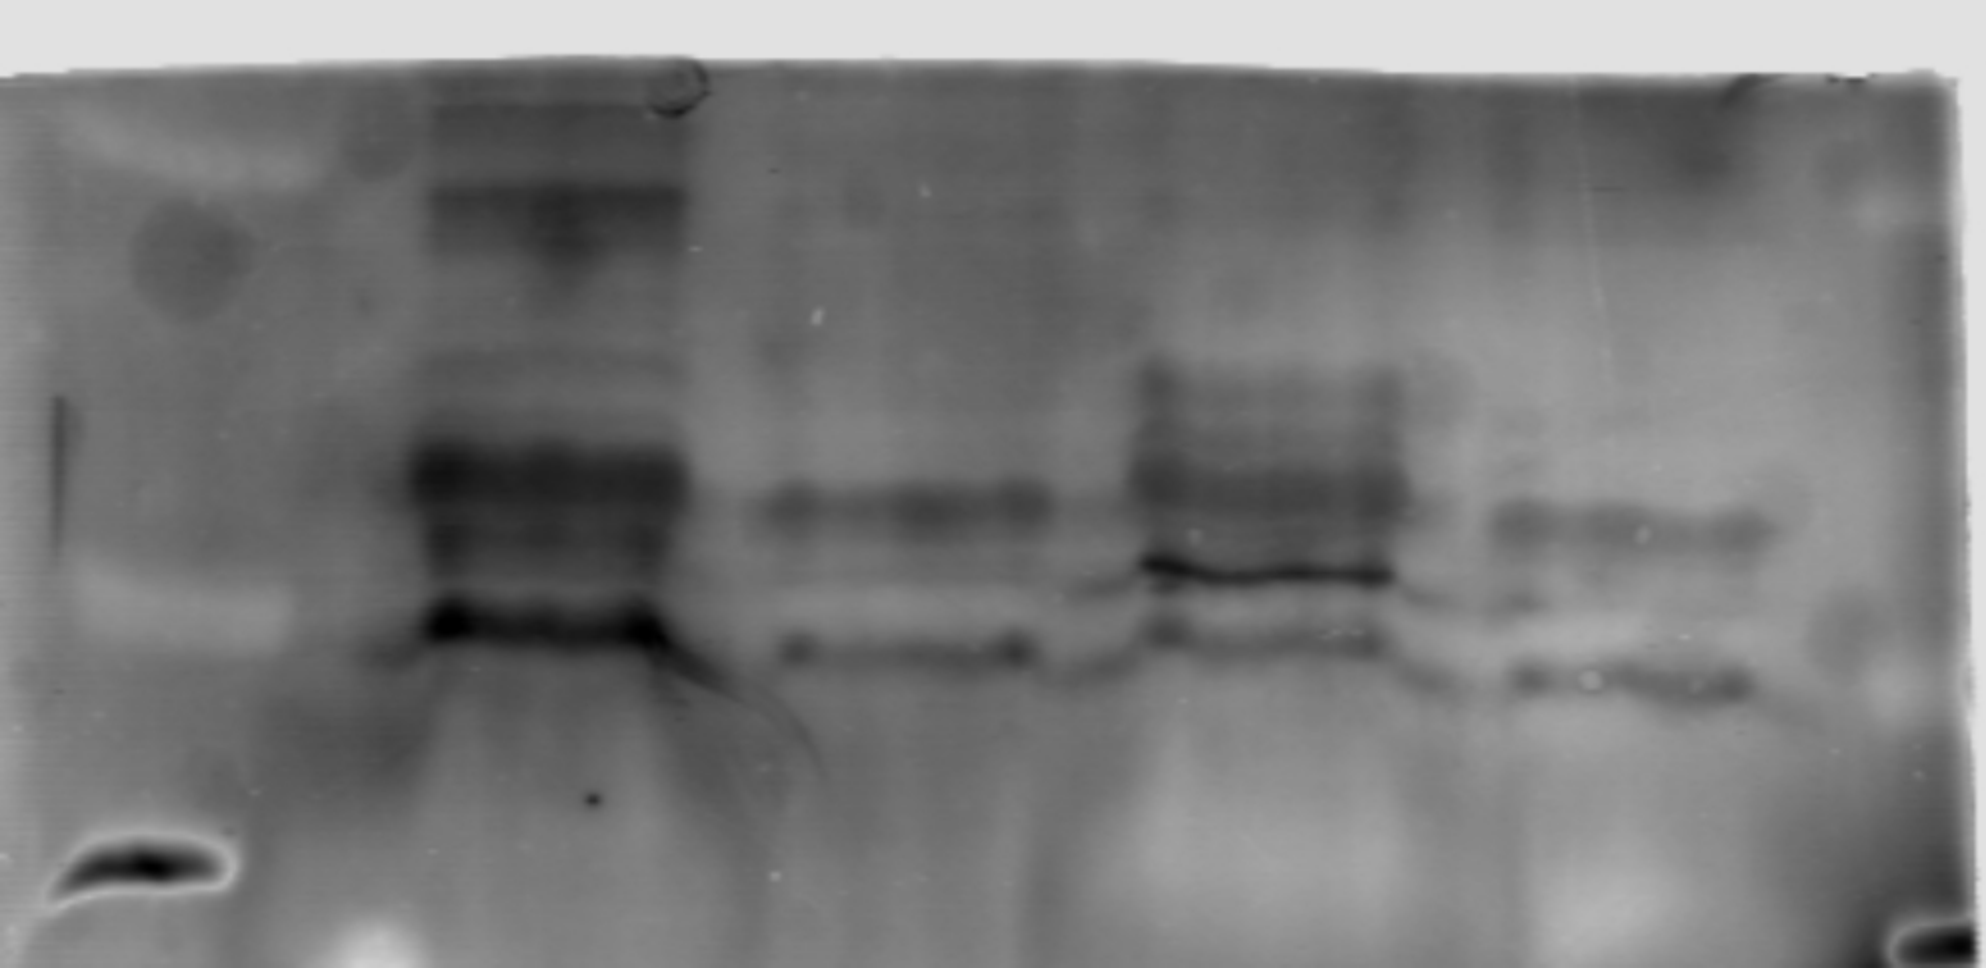

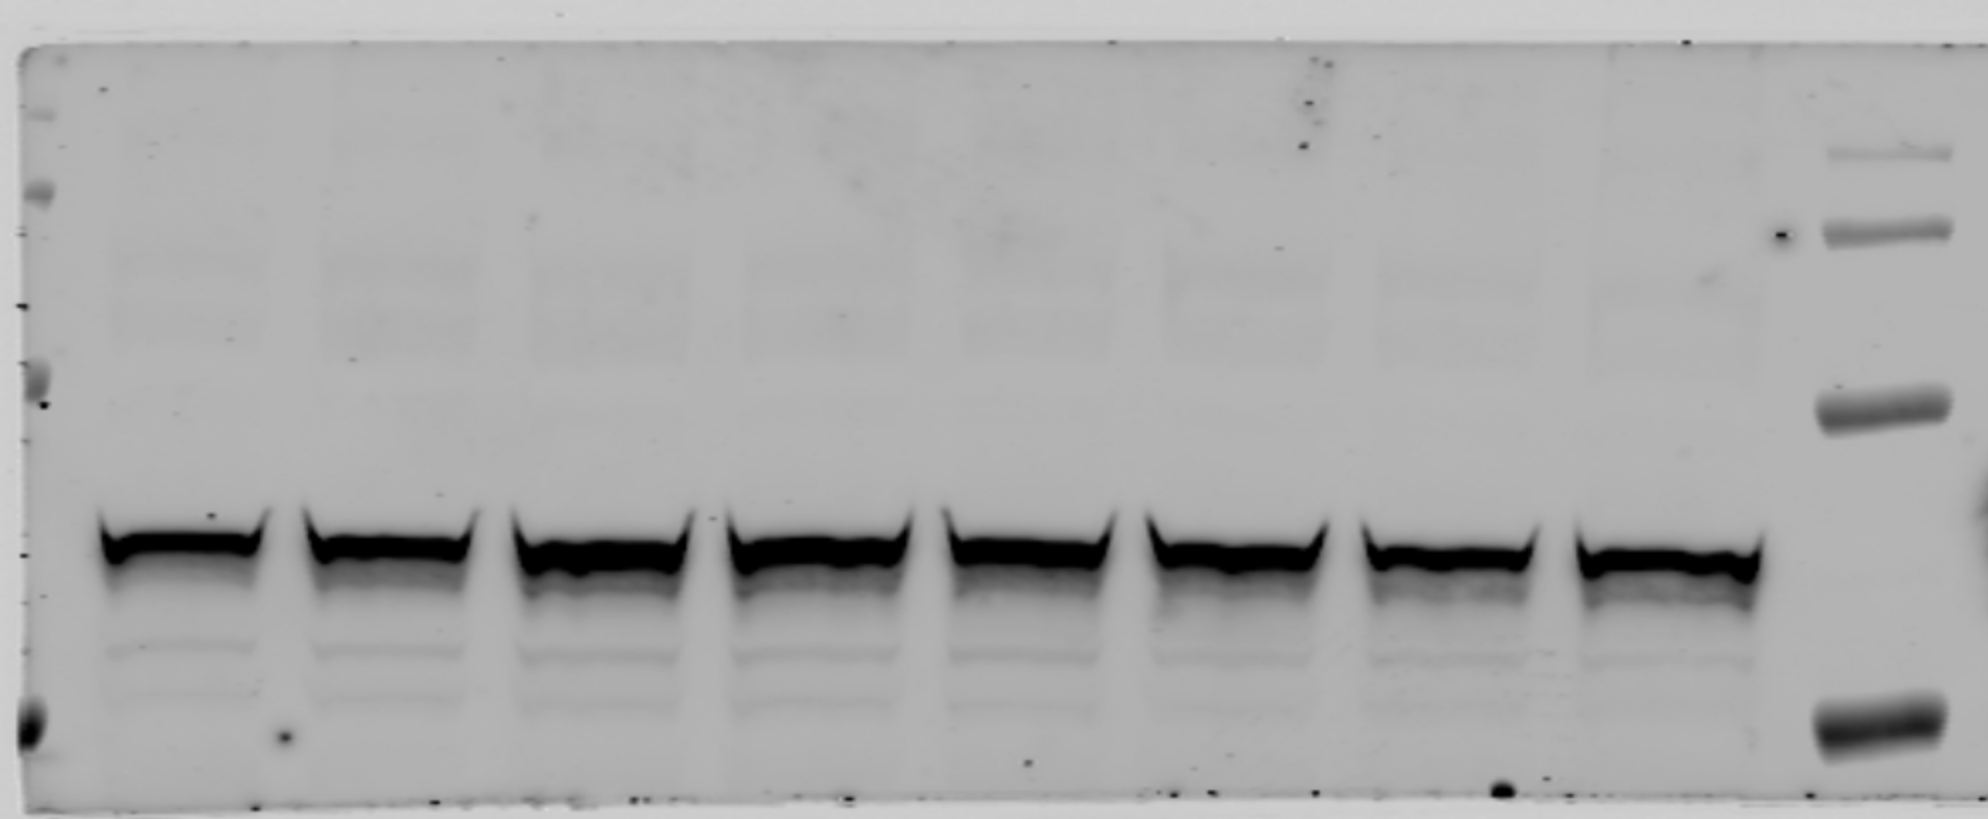

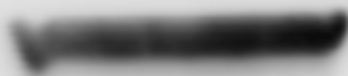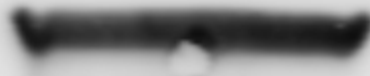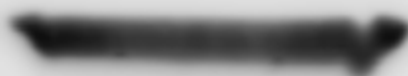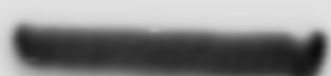



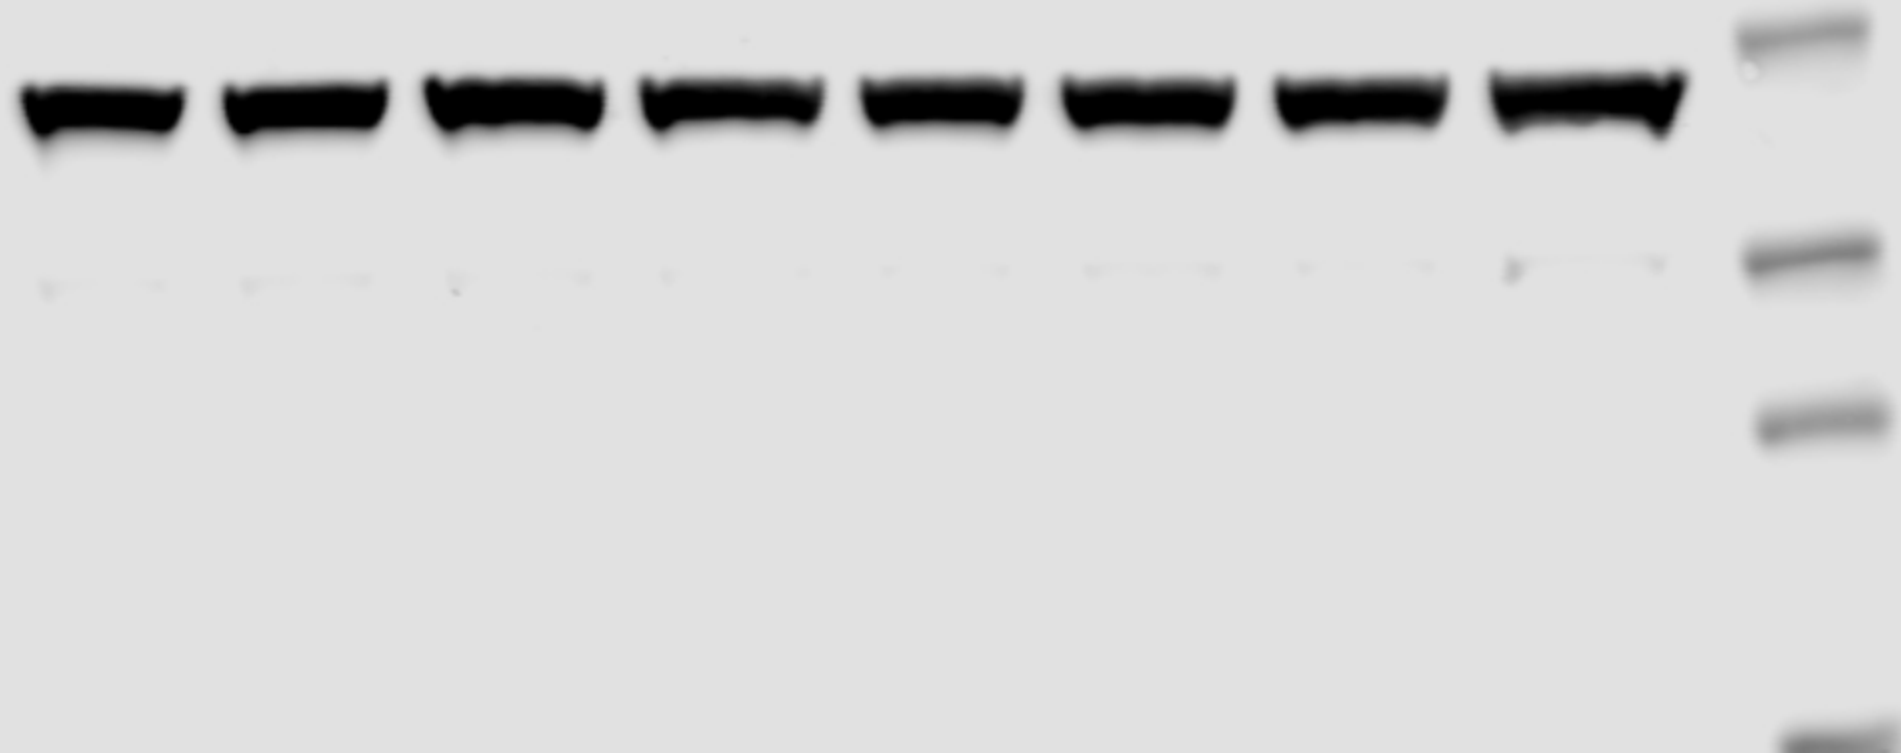

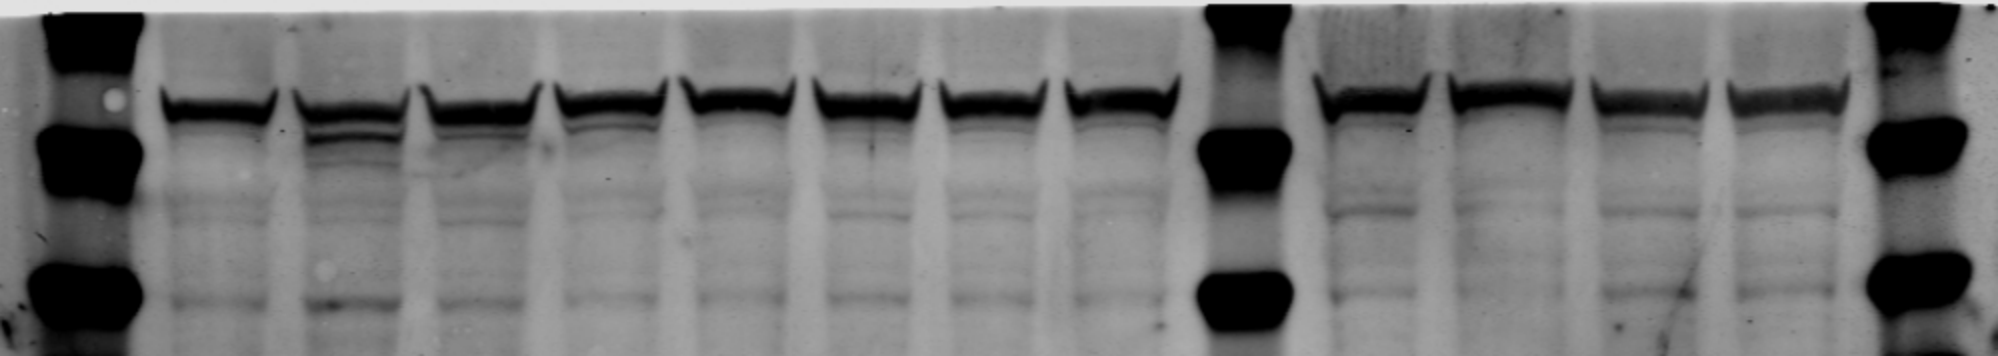

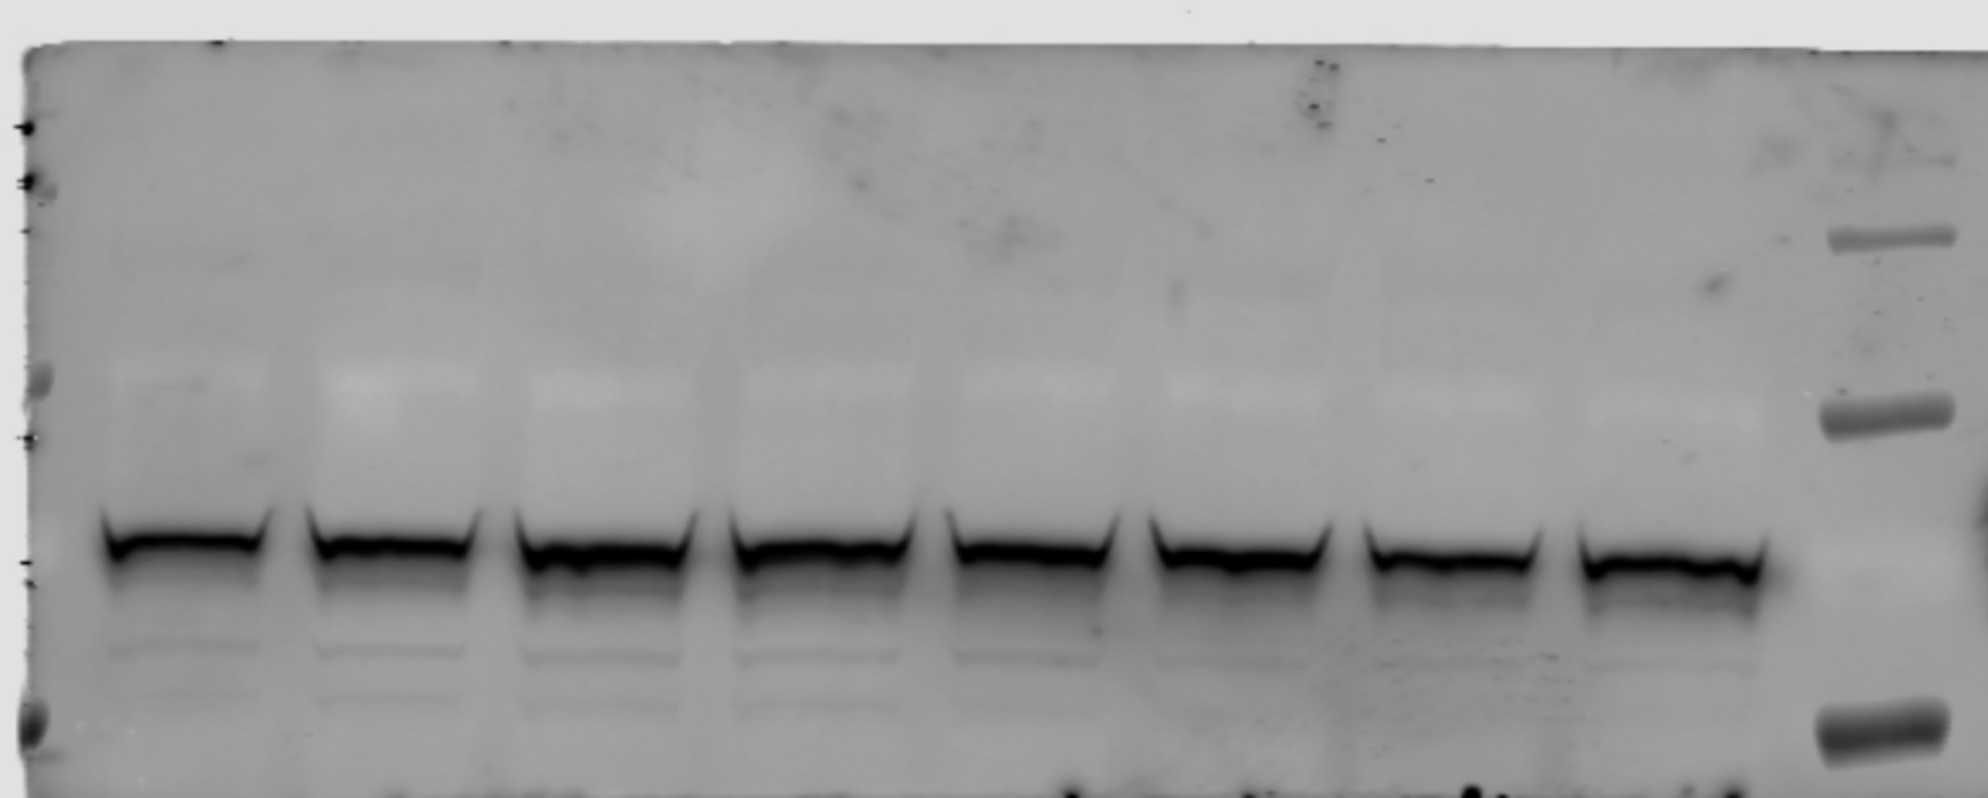

1111

1111

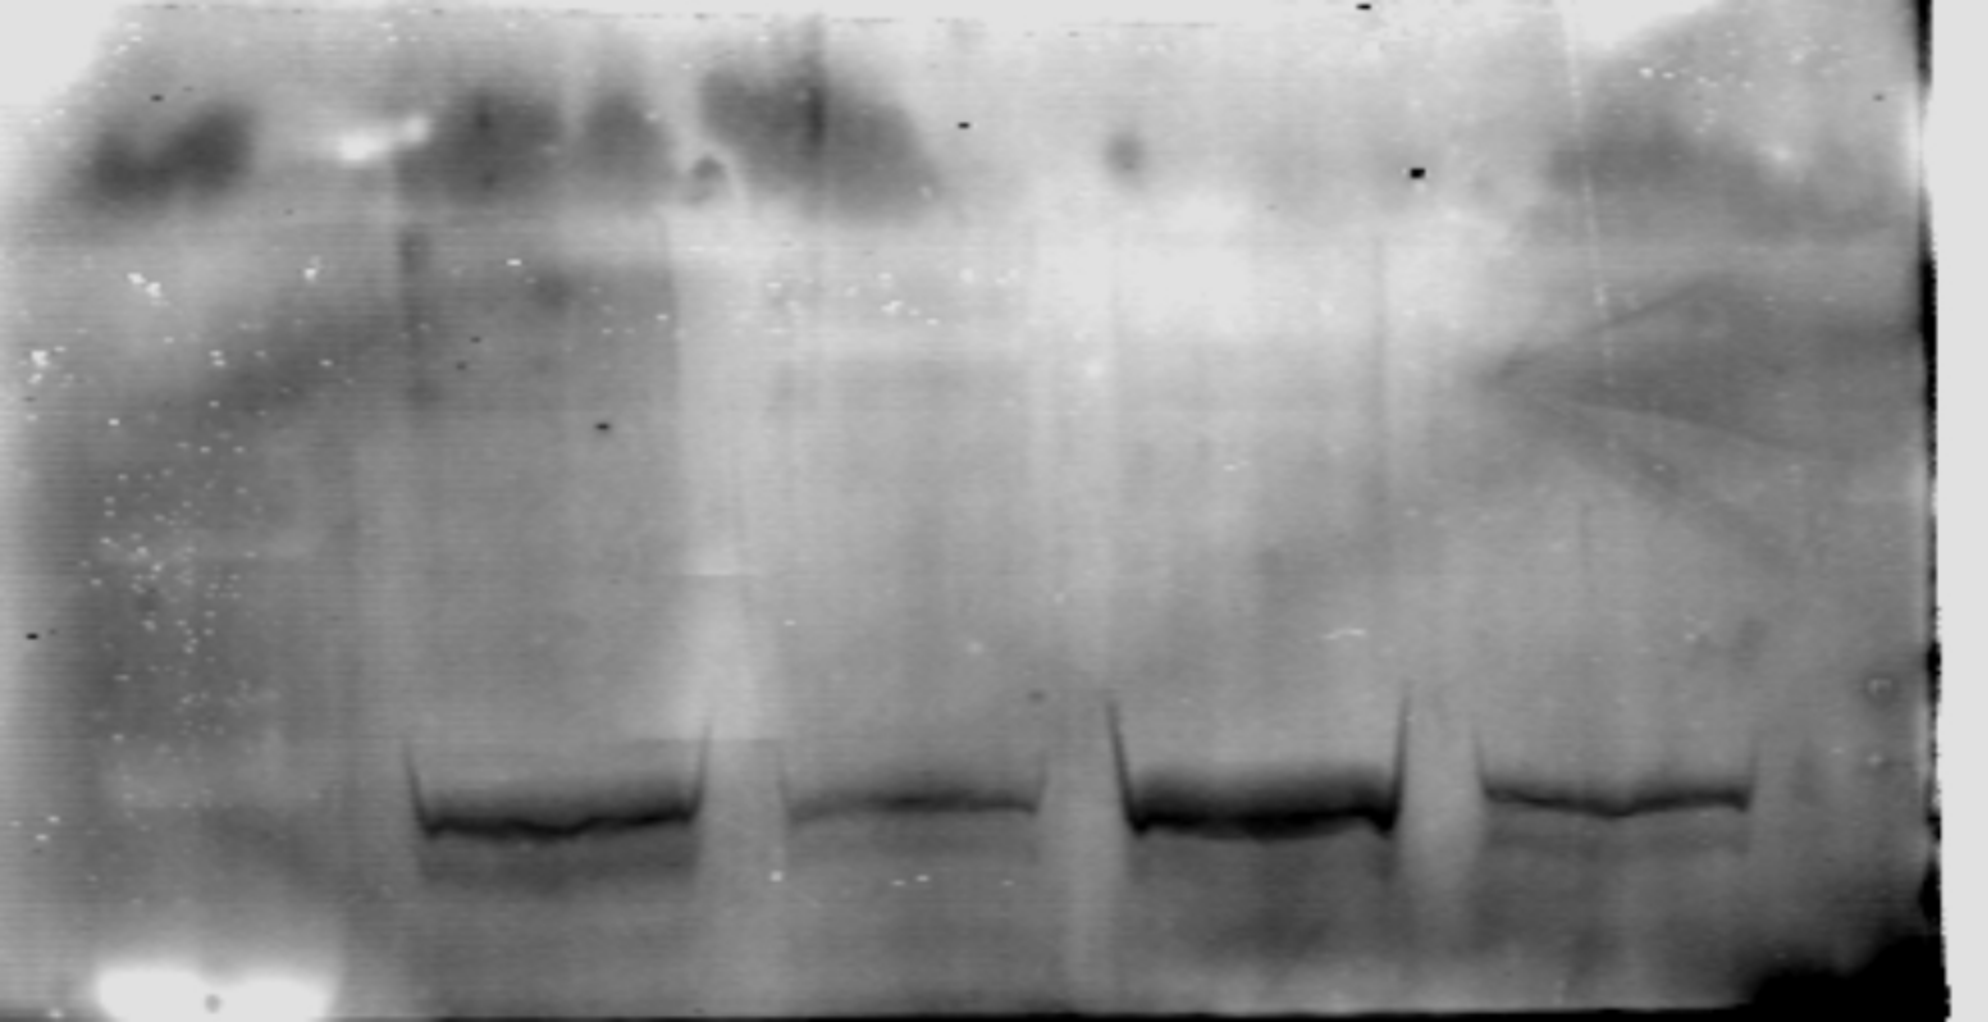

1

1

1

1

1

1

1

1

1

1

1

1

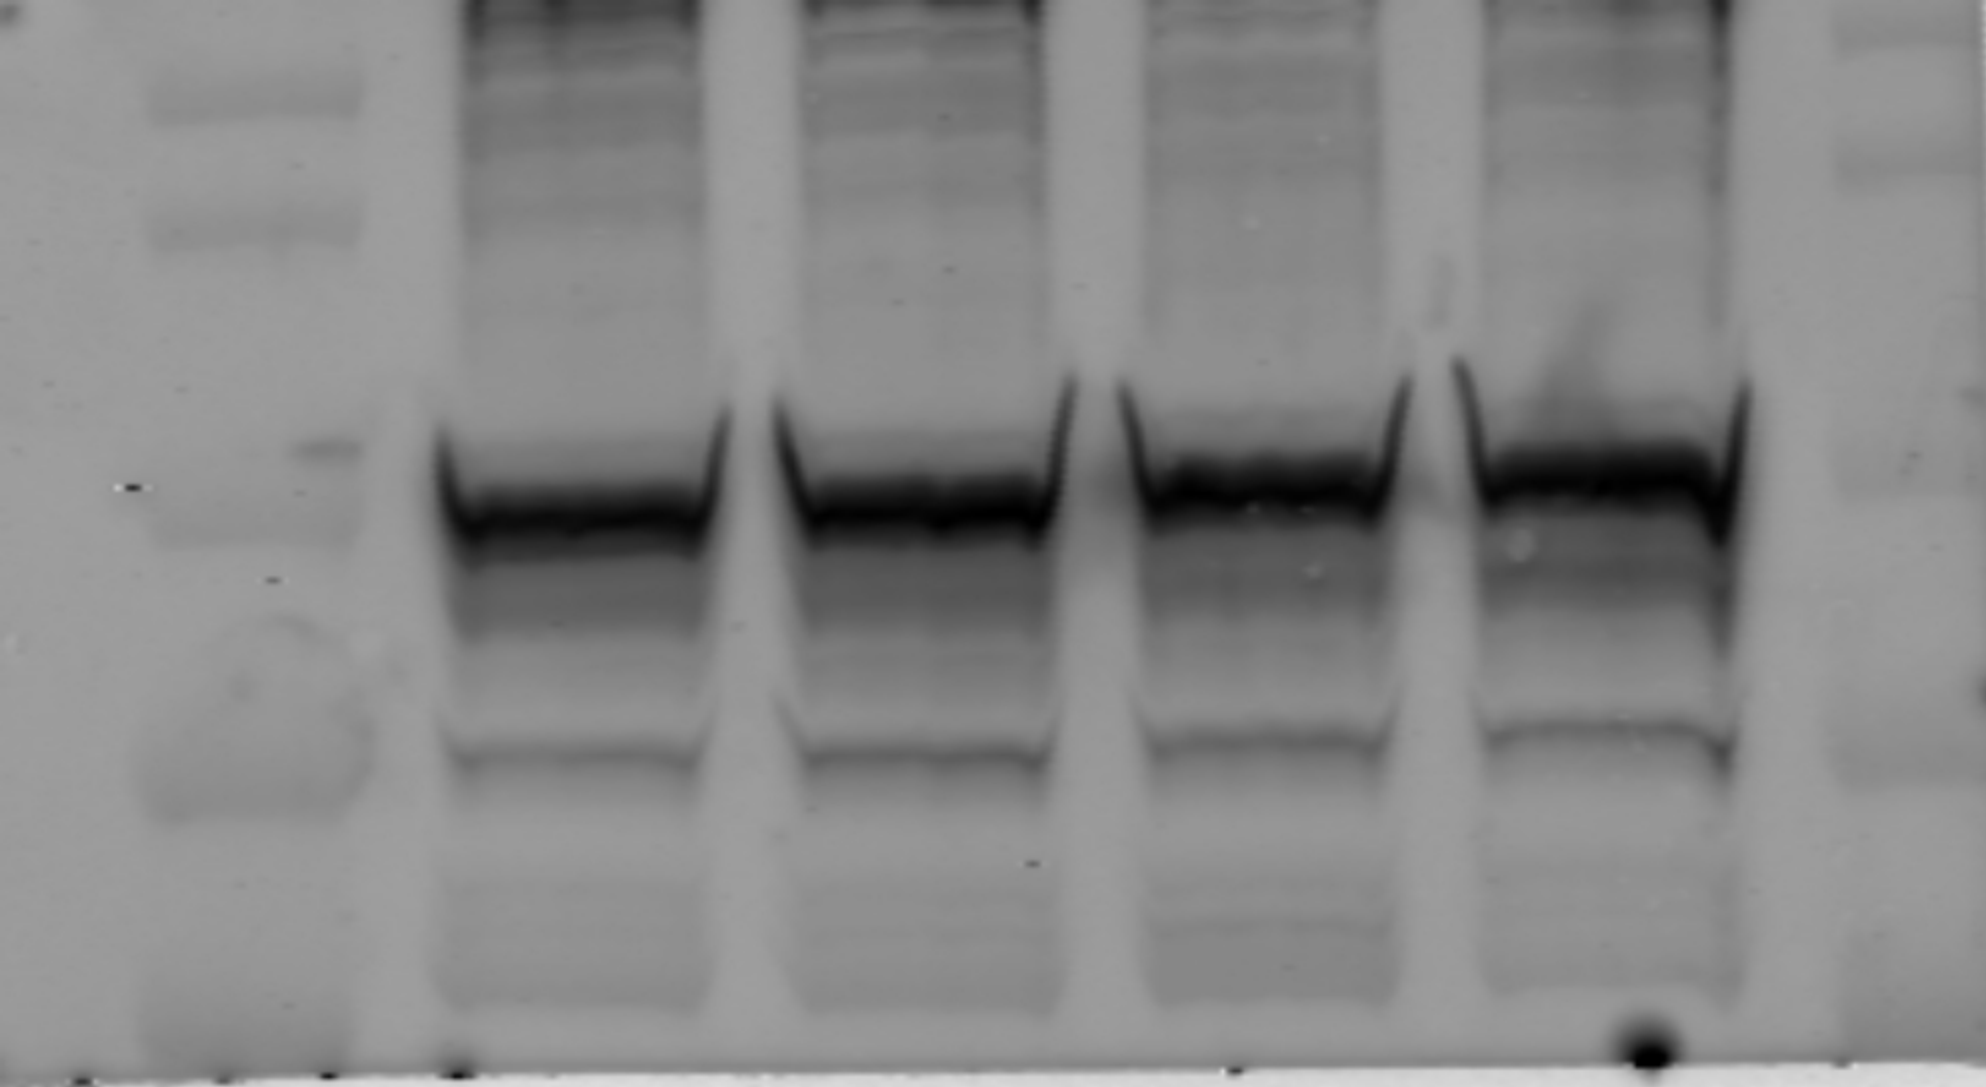

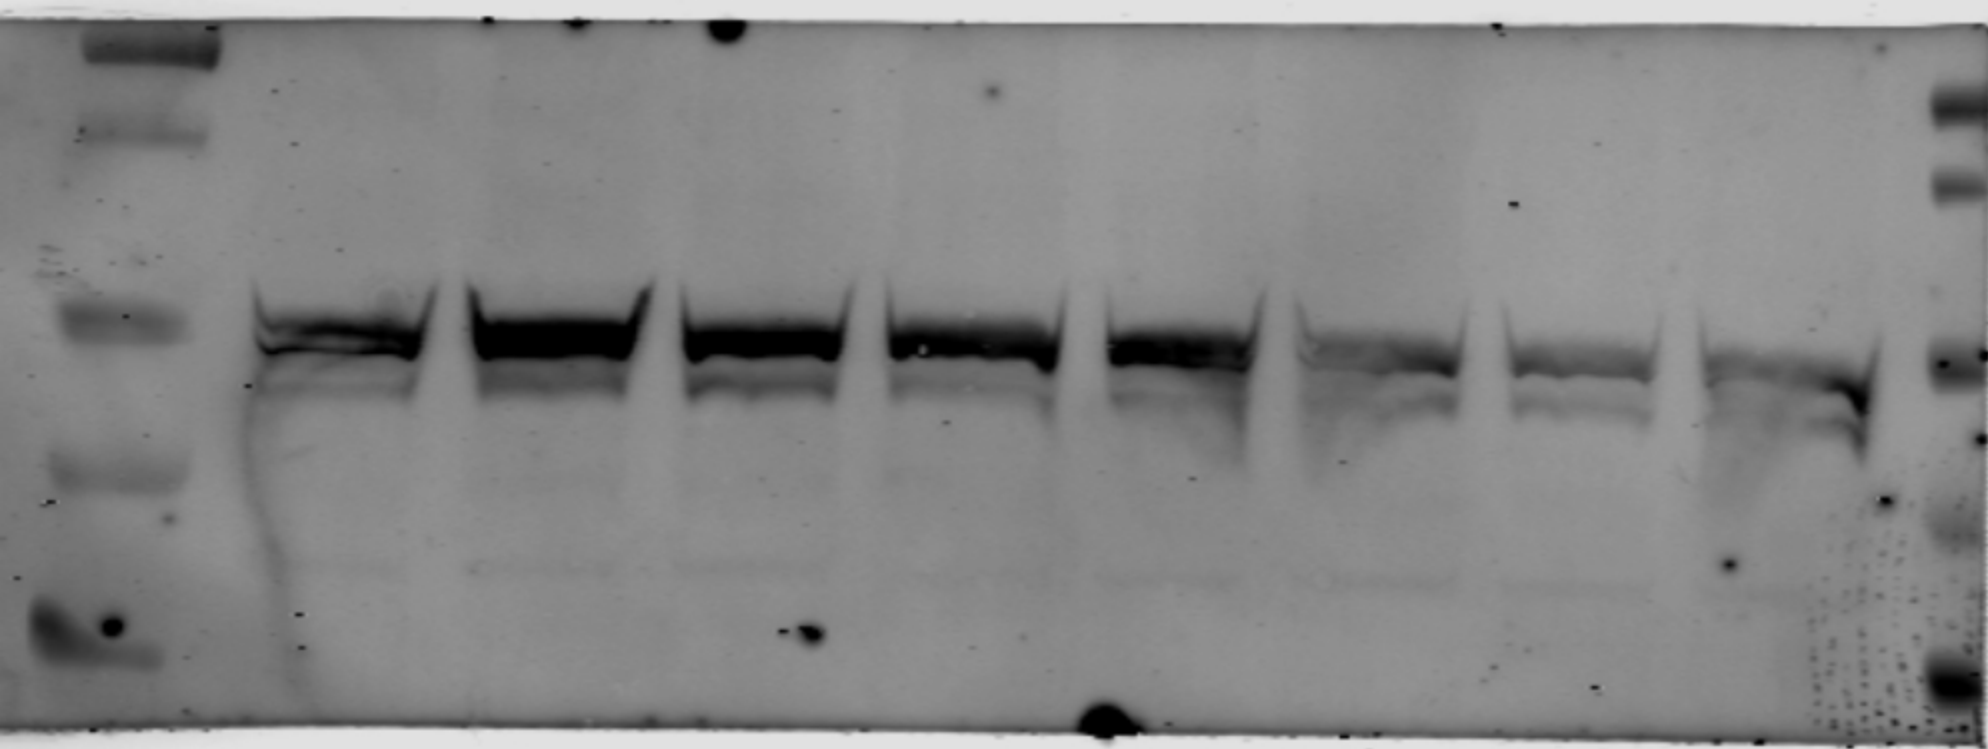



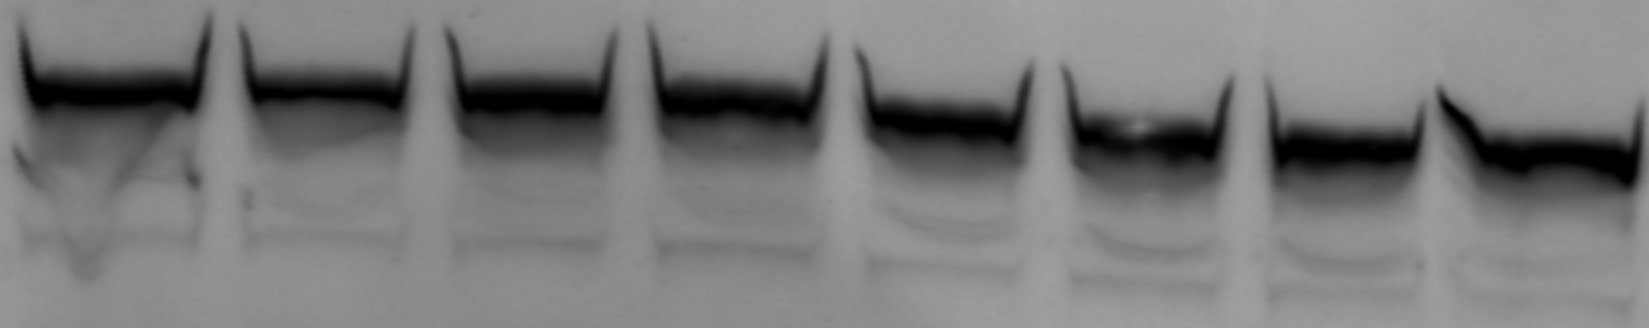

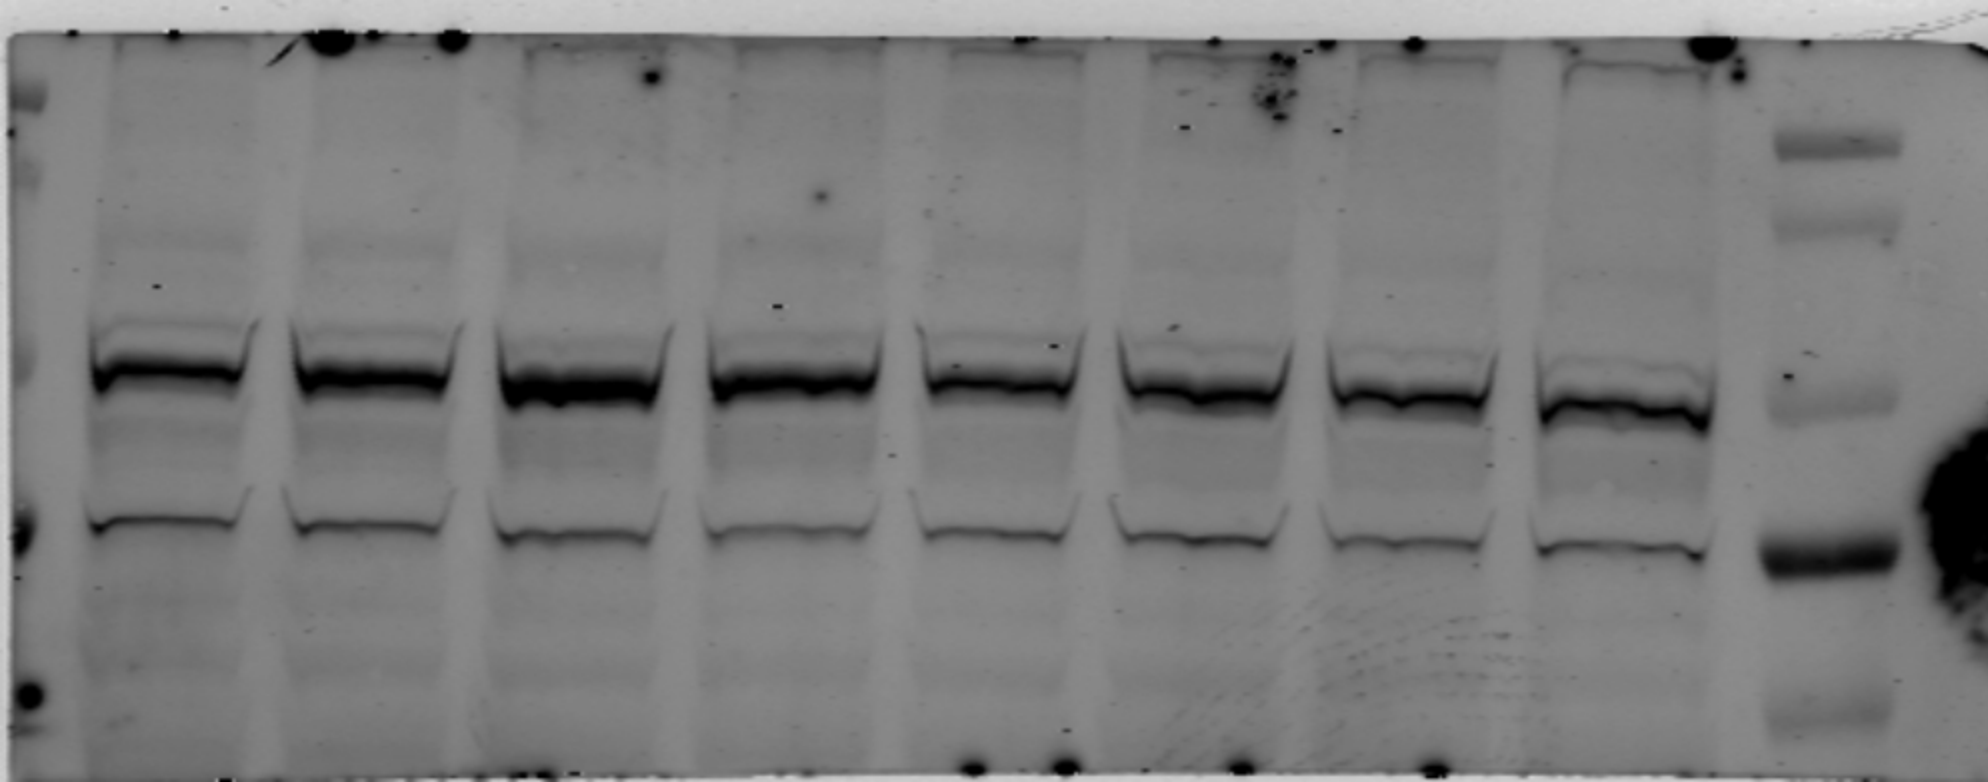

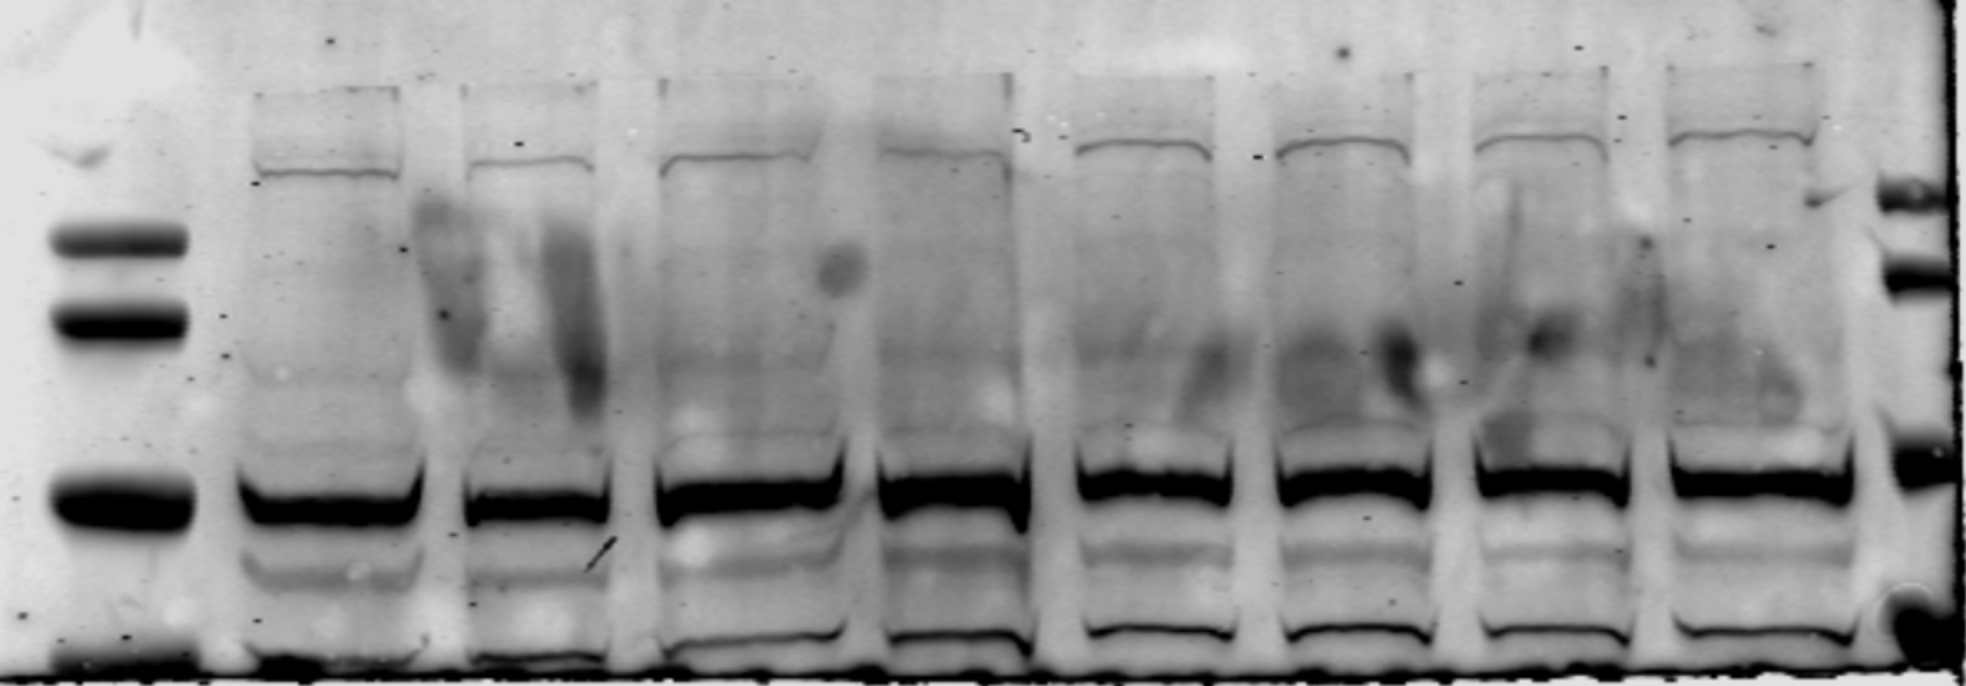

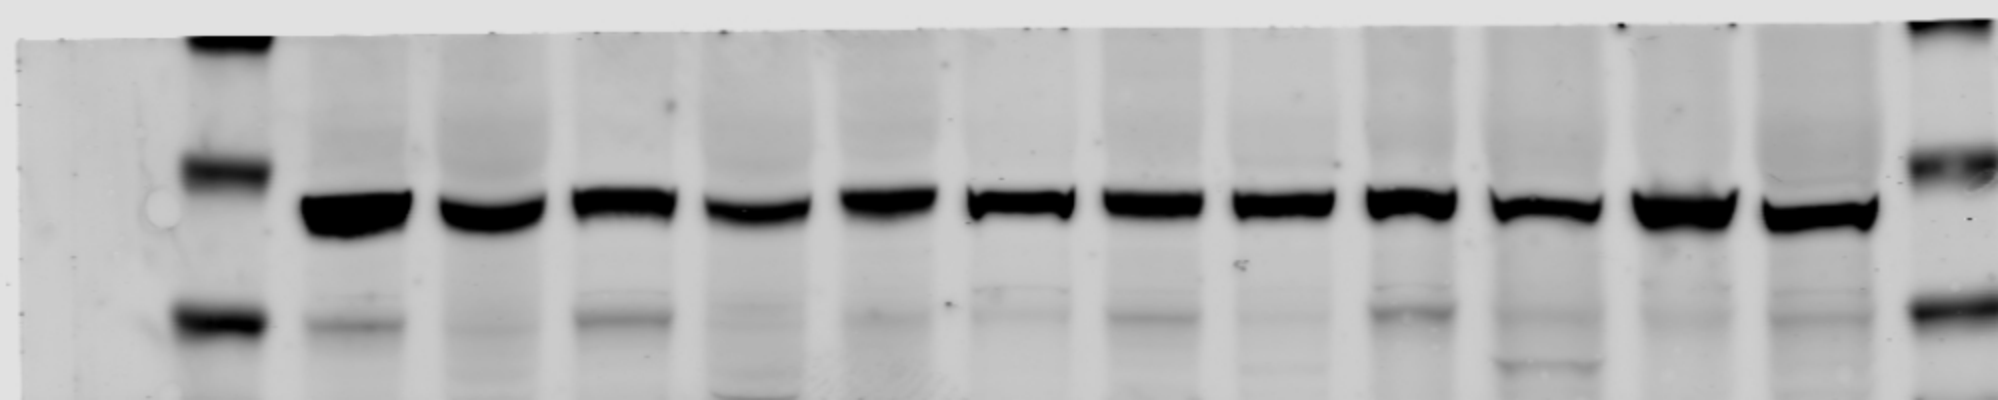

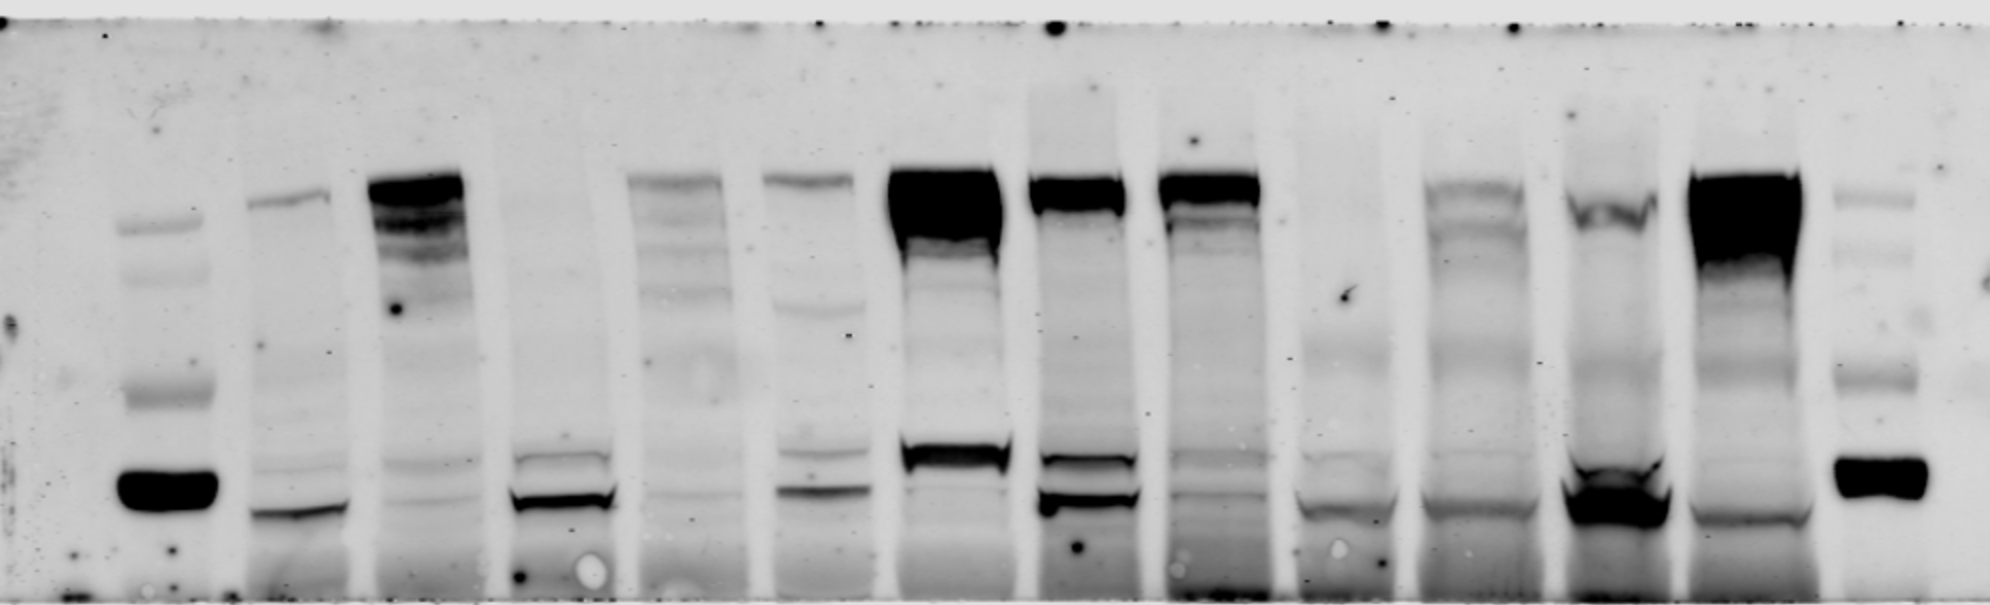

Supplement: 41420_2024_1995_MOESM1_ESM.pdf [file 41420_2024_1995_MOESM1_ESM.pdf]
